# Supplementary material for: Effect of screening by clinical breast examination on breast cancer incidence and mortality after 20 years: prospective, cluster randomised controlled trial in Mumbai
Source: PubMed Central journal article supplement (PMC7903383; doi:10.1136/bmj.n256), 2021-02-24
Supplement: miti060253.ww.pdf [file miti060253.ww.pdf]

## Supplementary Table 1:

### Distribution of participants by demographic and breast cancer risk factors

| Variables                                                      |                | Screening arm<br>N=75360 (%) | Control arm<br>N=76178(%) |
|----------------------------------------------------------------|----------------|------------------------------|---------------------------|
| <b>Age groups</b>                                              | 35-39          | 22718 (30.22)                | 22832 (30.00)             |
|                                                                | 40-44          | 17311 (23.03)                | 17245 (22.66)             |
|                                                                | 45-49          | 14183 (18.86)                | 14111 (18.54)             |
|                                                                | 50-54          | 9422 (12.53)                 | 9564 (12.57)              |
|                                                                | 55-59          | 6049 (08.05)                 | 6127 (08.05)              |
|                                                                | 60-64          | 5494 (07.31)                 | 6218 (08.17)              |
| <b>Mean age (SD)</b>                                           |                | 44.84 (07.86)                | 44.92 (08.01)             |
| <b>Median (IQR)</b>                                            |                | 43 (Q1 38, Q3 50, IQR 12)    | 43 (Q1 38, Q3 50, IQR 12) |
| <b>Marital status</b>                                          | Unmarried      | 295 (00.40)                  | 454 (00.60)               |
|                                                                | Married        | 61584 (82.60)                | 62048 (82.62)             |
|                                                                | Widowed        | 12289 (16.48)                | 12301 (16.38)             |
|                                                                | Divorced       | 393 (00.53)                  | 302 (00.40)               |
| <b>Menstrual status</b>                                        | Premenopausal  | 40361 (53.78)                | 40913 (53.85)             |
|                                                                | Postmenopausal | 32845 (43.77)                | 33456 (44.04)             |
|                                                                | Perimenopausal | 1842 (02.45)                 | 1601 (02.11)              |
| <b>Mean age at menarche (S.D)</b>                              |                | 13.79 (01.26)                | 13.85 (01.24)             |
| <b>Mean age at menopause (S.D)</b>                             |                | 43.36 (04.96)                | 43.62 (04.87)             |
| <b>Mean age at marriage (S.D)</b>                              |                | 17.99 (03.89)                | 17.85 (03.82)             |
| <b>Mean age at first child birth (S.D)</b>                     |                | 20.82 (03.70)                | 20.74 (03.61)             |
| <b>Average number of children (S.D)</b>                        |                | 3.58 (01.61)                 | 3.56 (01.61)              |
| <b>Breast feeding (%)</b>                                      | Yes            | 70002(98.85)                 | 70389 (98.64)             |
|                                                                | No             | 811 (01.15)                  | 971 (01.36)               |
| <b>Family history of breast cancer (%)</b>                     | Yes            | 517 (00.70)                  | 504 (00.68)               |
|                                                                | No             | 73312 (99.30)                | 74050 (99.32)             |
| <b>Previous consultation for breast-related complaints (%)</b> | Yes            | 882 (01.21)                  | 785 (01.06)               |
|                                                                | No             | 72105 (98.79)                | 73142 (98.94)             |

## Supplementary Table 2:

Compliance to screening, referral and breast cancer cases detected till round 4 in screening arm

| Screening Round             | Eligible Women | Women Examined | Compliance to Screening (%) | Screen +ve cases N (%) | Compliance of screen +ve cases to referral N (%) | Breast Cancers Confirmed |
|-----------------------------|----------------|----------------|-----------------------------|------------------------|--------------------------------------------------|--------------------------|
| <b>One</b>                  | 75360          | 56985          | 75.62                       | 350 (0.61)             | 239 (68.29)                                      | 32                       |
| <b>Two</b>                  | 74922          | 49012          | 65.42                       | 552 (1.13)             | 393 (71.20)                                      | 55                       |
| <b>Three</b>                | 74211          | 47133          | 63.51                       | 638 (1.35)             | 503 (78.84)                                      | 42                       |
| <b>Four</b>                 | 73241          | 46554          | 63.52                       | 1024 (2.20)            | 819 (79.98)                                      | 70                       |
| <b>Total &amp;/ or Mean</b> | <b>74433</b>   | <b>49921</b>   | <b>67.07</b>                | <b>1.28</b>            | <b>76.21</b>                                     | <b>199</b>               |

\*One participant was considered twice because of bilateral breast cancer

### Supplementary Table 3:

#### Breast cancers detected during 4 rounds of screening

|                    |                  |            |
|--------------------|------------------|------------|
| <b>Round One</b>   | Screen detected  | 32         |
|                    | Interval cancers | 26         |
|                    | Non- Compliers   | 04         |
| <b>Round Two</b>   | Screen detected  | 25         |
|                    | Interval cancers | 14         |
|                    | Non- Compliers   | 01         |
| <b>Round Three</b> | Screen detected  | 27         |
|                    | Interval cancers | 37         |
|                    | Non- Compliers   | 03         |
| <b>Round Four</b>  | Screen detected  | 30         |
| <b>Total</b>       |                  | <b>199</b> |

\*One participant was considered twice because of bilateral breast cancer

### **Supplementary Table 4:**

**Compliance to active surveillance and breast cancer cases recorded during rounds 5 – 9 in screening arm**

| <b>Round</b>                | <b>Eligible Women</b> | <b>Compliance to Surveillance (%)</b> | <b>Breast Cancers</b> |
|-----------------------------|-----------------------|---------------------------------------|-----------------------|
| <b>Five</b>                 | <b>71886</b>          | <b>57549 (80.06)</b>                  | <b>74</b>             |
| <b>Six</b>                  | <b>70455</b>          | <b>55310 (78.50)</b>                  | <b>75</b>             |
| <b>Seven</b>                | <b>69006</b>          | <b>53732 (77.87)</b>                  | <b>74</b>             |
| <b>Eight</b>                | <b>67437</b>          | <b>51951 (77.04)</b>                  | <b>67</b>             |
| <b>Nine</b>                 | <b>64099</b>          | <b>47705 (74.42)</b>                  | <b>152</b>            |
| <b>Total breast cancers</b> |                       |                                       | <b>442</b>            |

## Supplementary Table 5:

Compliance to active surveillance and breast cancer cases recorded from round 1- 9 in control arm

| Round                                                  | Eligible women | Compliance to surveillance (%) | Breast cancers |
|--------------------------------------------------------|----------------|--------------------------------|----------------|
| One                                                    | 76178          | 69227 (90.88)                  | 2              |
| Two                                                    | 75654          | 62763 (82.96)                  | 38             |
| Three                                                  | 74842          | 59541 (79.56)                  | 51             |
| Four                                                   | 73768          | 59303 (80.39)                  | 60             |
| <b>Sub-total after 4 rounds of active surveillance</b> |                |                                | <b>151</b>     |
|                                                        |                |                                |                |
| Five                                                   | 72341          | 56689 (78.36)                  | 74             |
| Six                                                    | 70914          | 54576 (76.96)                  | 87             |
| Seven                                                  | 69381          | 53158 (76.62)                  | 83             |
| Eight                                                  | 67784          | 51427 (75.87)                  | 81             |
| Nine                                                   | 64325          | 47143 (73.29)                  | 179            |
| <b>Sub-total in rounds 5-9 of active surveillance</b>  |                |                                | <b>504</b>     |
| <b>Total breast cancers</b>                            |                |                                | <b>655</b>     |

**Supplementary Table 6**

**Women availing breast cancer treatment at TMH and Other Hospitals**

| <b>Treatment Taken</b>         | <b>Screening Arm (%)</b> | <b>Control Arm (%)</b> | <b>Pearson <math>\chi^2</math><br/>P-value</b> |
|--------------------------------|--------------------------|------------------------|------------------------------------------------|
| TMH as well as other hospitals | 413 (64.53)              | 399 (60.91)            | $\chi^2 = 1.717$<br><br>$p = 0.190$            |
| Other hospitals only           | 227 (35.47)              | 255 (38.93)            |                                                |
| No information                 | -                        | 1(0.15)                |                                                |
| <b>Total</b>                   | <b>640</b>               | <b>655</b>             |                                                |

**Supplementary Table 7:****Cumulative breast cancer cases in Screening and Control Arm during successive rounds**

| <b>Screening arm</b>        |     | <b>Control arm</b>          |     |
|-----------------------------|-----|-----------------------------|-----|
| Screening Round 1           | 32  | Active Surveillance Round 1 | 2   |
| Screening Round 2           | 87  | Active Surveillance Round 2 | 40  |
| Screening Round 3           | 129 | Active Surveillance Round 3 | 91  |
| Screening Round 4           | 199 | Active Surveillance Round 4 | 151 |
|                             |     |                             |     |
| Active Surveillance Round 1 | 273 | Active Surveillance Round 5 | 225 |
| Active Surveillance Round 2 | 348 | Active Surveillance Round 6 | 312 |
| Active Surveillance Round 3 | 422 | Active Surveillance Round 7 | 395 |
| Active Surveillance Round 4 | 489 | Active Surveillance Round 8 | 476 |
| Active Surveillance Round 5 | 641 | Active Surveillance Round 9 | 655 |

**Supplementary Table 8:**

**Breast cancer mortality on the basis of attendance to number of screening rounds (3 or 4)**

|                                                                    | Screening arm |                             |              |                         | Control arm  |                             |              |                         | Rate ratio (95% CI)   | P-Value |
|--------------------------------------------------------------------|---------------|-----------------------------|--------------|-------------------------|--------------|-----------------------------|--------------|-------------------------|-----------------------|---------|
|                                                                    | No. of women  | No. of breast cancer deaths | Person years | **Crude rate (95% CI)   | No. of women | No. of breast cancer deaths | Person years | **Crude rate (95% CI)   |                       |         |
| <b>Breast cancer mortality: Screened in all 4 screening rounds</b> |               |                             |              |                         |              |                             |              |                         |                       |         |
| <b>Age*</b>                                                        | 24984         | 62                          | 394239.1     | 15.726 (13.57 to 18.43) | 76178        | 251                         | 1019500      | 24.620 (21.71 to 28.04) | 0.639 (0.526 – 0.776) | <0.001  |
| <b>&lt; 50</b>                                                     | 19296         | 43                          | 309187.8     | 13.907 (11.41 to 17.16) | 54188        | 158                         | 751367       | 21.028 (18.97 to 23.44) | 0.661 (0.527 – 0.830) | <0.001  |
| <b>≥ 50</b>                                                        | 5688          | 19                          | 85051.27     | 22.339 (16.52 to 30.46) | 21909        | 93                          | 268133.1     | 34.684 (27.54 to 44.37) | 0.644 (0.445 – 0.931) | 0.02    |
|                                                                    | Screening arm |                             |              |                         | Control arm  |                             |              |                         | Rate ratio (95% CI)   | P-Value |
|                                                                    | No. of women  | No. of breast cancer deaths | Person years | **Crude rate (95% CI)   | No. of women | No. of breast cancer deaths | Person years | **Crude rate (95% CI)   |                       |         |
| <b>Breast cancer mortality: Screened in 3 screening rounds</b>     |               |                             |              |                         |              |                             |              |                         |                       |         |
| <b>Age*</b>                                                        | 19825         | 57                          | 291331.5     | 19.565 (14.69 to 26.76) | 76178        | 251                         | 1019500      | 24.620 (21.71 to 28.04) | 0.795 (0.578 – 1.092) | 0.16    |
| <b>&lt; 50</b>                                                     | 14482         | 40                          | 217467.3     | 18.394                  | 54188        | 158                         | 751367       | 21.028                  | 0.875                 | 0.48    |



|             |      |    |          |                                  |       |    |          |                                  |                                |      |
|-------------|------|----|----------|----------------------------------|-------|----|----------|----------------------------------|--------------------------------|------|
|             |      |    |          | (12.88<br>to<br>27.67)           |       |    |          | (18.97<br>to<br>23.44)           | (0.603<br>–<br>1.269)          |      |
| <b>≥ 50</b> | 5342 | 17 | 73864.24 | 23.015<br>(16.14<br>to<br>33.39) | 21909 | 93 | 268133.1 | 34.684<br>(27.54<br>to<br>44.37) | 0.664<br>(0.439<br>–<br>1.002) | 0.05 |

\*Information on age was not available for 183 women in screening arm and 81 women in control arm among the total women enrolled

\*\*Crude rate per 100000 person years. #Rate Ratio = Rate Ratio calculated by 'Poisson regression model 'after adjusting for 'cluster design'.

**Supplementary Figure 1: Survival of women in whom staging information was unavailable; 41 cases in screening and 73 cases in control arms.**

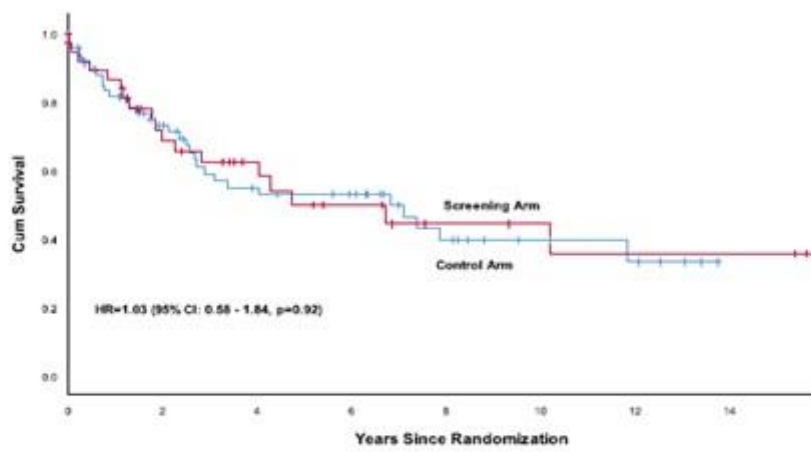

| No. of Patients | 0  | 2  | 4  | 6  | 8  | 10 | 12 | 14 |
|-----------------|----|----|----|----|----|----|----|----|
| Screening Arm   | 40 | 22 | 15 | 10 | 6  | 5  | 4  | 3  |
| Control Arm     | 73 | 39 | 26 | 22 | 12 | 7  | 5  | 1  |

**Supplementary Figure 2:** Cumulative all-cause mortality over twenty years.

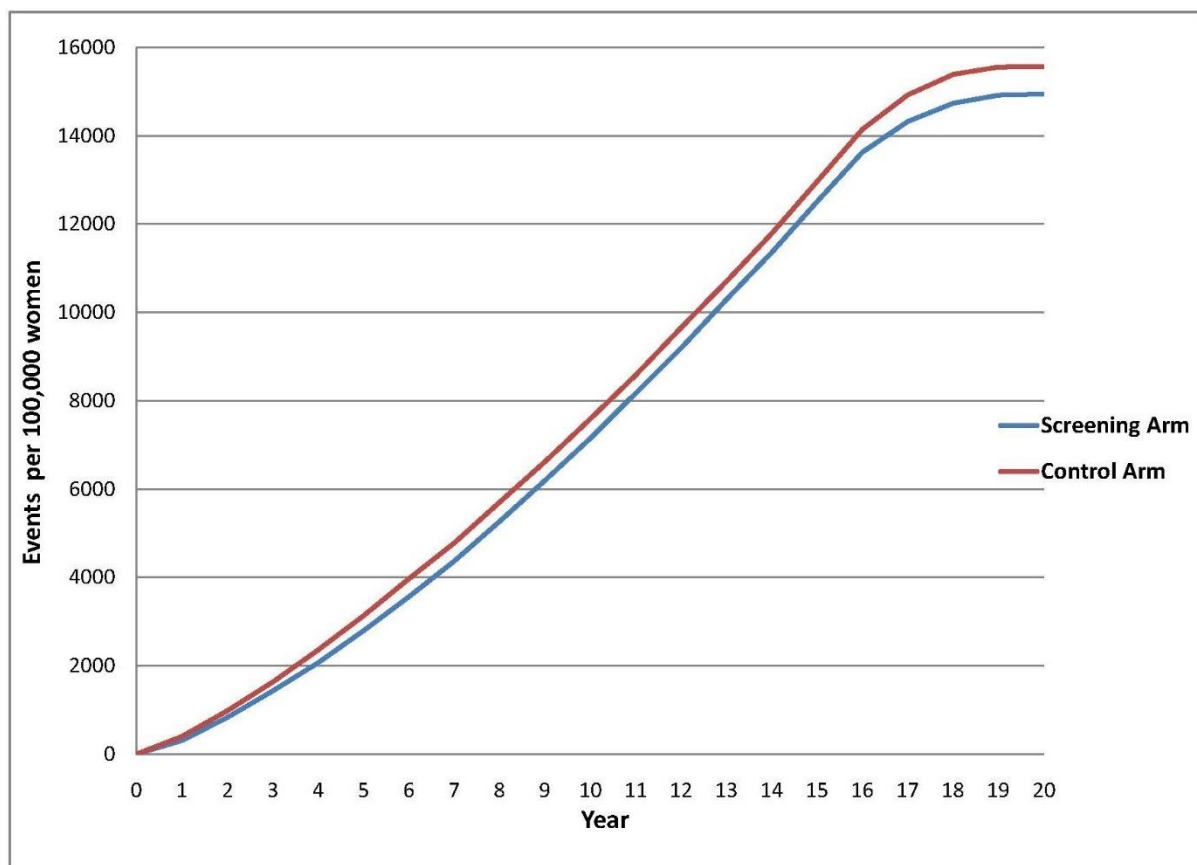

## **Information about the linkage systems and process:**

The primary collection of follow up data was done through individual household visits by our Medical Social Workers who collected information on ~85% of incident and death cases in the study. The rest of the data were collected through linkages with Municipal Corporation of Greater Mumbai (MCGM) and Mumbai Cancer Registry.

The vital statistics division of the Municipal Corporation of Greater Mumbai (MCGM) has one of the most advanced birth and death record registries in India. Records have been validated through independent audits to be 95% complete. Records of MCGM are computerized and available within six months of an event of birth or death. The municipal death records were obtained every six months and were matched with the primary trial data mentioned above. Finally, our Medical Social Workers made individual home visits to corroborate details of women in study which were matched with the MCGM data.

The Bombay Cancer Registry, established in 1963, is the oldest population based cancer registry to be set up in India. This registry was started with inputs from the NIH and the Descriptive Epidemiology Unit of IARC. Subsequently, the registry staff were further trained at the University of Tampere, Finland under the guidance of Prof. Matti Hakama. The Registry collects cancer related information from all major hospitals and private nursing homes. The major cancer hospitals are visited daily, while other hospitals and nursing homes are visited once a week. The maximum time lag between a diagnosed case of cancer and the availability of this information at the Bombay Cancer Registry is one week. It however takes three years for the registry to collate, quality check and publish the data. A quality control survey conducted by Indian Council of Medical Research (ICMR) to assess the quality and completeness of the Bombay Cancer Registry records shows a completeness of 95.4%.

### **Reference:**

Yeole BB. An assessment of improvement in reliability and completeness of Mumbai cancer registry data from 1964-1997. *Asian Pac J Cancer Prev.* 2001;2(3):225-32.
